# Supplementary material for: Novel synthesis of a NiMoP phosphide catalyst in a CH4–CO2 gas mixture
Source: Royal Society of Chemistry journal article supplement (doi:10.1039/c9dt03424b), 2019-01-01
Supplement: c9dt03424b1.pdf [file c9dt03424b1.pdf]

## Supplementary Information

### 1. Experimental Section

#### 1.1 Catalyst preparation and evaluation

We synthesized the  $\text{Ni}_x\text{Mo}_y\text{P}_1$  oxidic precursors by stirring an aqueous solution of  $\text{Ni}(\text{NO}_3)_2 \cdot 6\text{H}_2\text{O}$ ,  $(\text{NH}_4)_6\text{Mo}_7\text{O}_{24} \cdot 4\text{H}_2\text{O}$  and  $(\text{NH}_4)_2\text{HPO}_4$  with a given molar ratio of  $\text{Ni}:\text{Mo}:\text{P}=x:y:1$  ( $x,y=0, 0.3, 0.6$  and  $1$ ) at room temperature (RT) for 1 h. In order to dissolve the precipitate, a few drops of nitric acid were added in the solutions. The solutions were dried in air at  $110\text{ }^\circ\text{C}$  for overnight to form  $\text{Ni}_x\text{Mo}_y\text{P}_1$  oxidic precursors. The synthesis of phosphides in  $\text{CH}_4\text{-CO}_2$  and the reforming reaction were carried out in a fixed-bed micro-reactor with an inner diameter of 10 mm at atmospheric pressure. The  $\text{Ni}_x\text{Mo}_y\text{P}_1$  oxidic precursors (0.2 g) were heated under a flow of  $\text{CH}_4$  and  $\text{CO}_2$  ( $\text{CH}_4/\text{CO}_2 = 1$ ,  $30\text{ ml min}^{-1}$ ) from RT to  $900\text{ }^\circ\text{C}$  at a rate of  $10\text{ }^\circ\text{C min}^{-1}$  and then the temperature was kepted at  $900\text{ }^\circ\text{C}$  for 0-30 h. In addition, the  $\text{Ni}_1\text{Mo}_1\text{P}_1$  oxidic precursors (0.2 g) were also heated under a flow of  $\text{H}_2$  ( $30\text{ ml min}^{-1}$ ) from RT to  $650\text{ }^\circ\text{C}$  at a rate of  $10\text{ }^\circ\text{C min}^{-1}$  and then the temperature was kepted at  $650\text{ }^\circ\text{C}$  for 2 h. Finally, the resulting sample was suffered from passivation process in a flow of  $1\%\text{O}_2/\text{Ar}$  for 12 h. Prior to the reaction, the catalyst prepared in  $\text{H}_2$  was preheated to  $900\text{ }^\circ\text{C}$  under an  $\text{H}_2$  flow and then a flow of  $\text{CH}_4$  and  $\text{CO}_2$  ( $\text{CH}_4/\text{CO}_2 = 1$ ,  $30\text{ ml min}^{-1}$ ) was allowed to pass through the catalyst. The conversions of  $\text{CH}_4$  and  $\text{CO}_2$ , and selectivity of  $\text{H}_2$  were defined as follows ( $n_{i,\text{in}}$  = the initial molar fraction of component  $i$  in the feed,  $n_{i,\text{out}}$

= the final molar fraction of component  $i$  in the gaseous effluent):

$$X_{CH_4}(\%) = \frac{n_{CH_4,in} - n_{CH_4,out}}{n_{CH_4,in}} \times 100$$

$$X_{CO_2}(\%) = \frac{n_{CO_2,in} - n_{CO_2,out}}{n_{CO_2,in}} \times 100$$

$$S_{H_2} = \frac{n_{H_2,out}}{2(n_{CH_4,in} - n_{CH_4,out})} \times 100$$

## 1.2 Catalyst characterization

X-ray diffraction (XRD) was conducted using an X-ray diffractometer (X'Pert Pro MPD) equipped with a Cu K $\alpha$  source. X-ray photoelectron spectroscopy (XPS) was carried out using a Kratos Axis ultra (DLD) equipped with Al K $\alpha$  X-ray source. The binding energies ( $\pm 0.2$  eV) were referenced to the C 1s peak at 284.8 eV due to adventitious carbon. SEM and TEM images were acquired using a scanning electron microscopy (SEM, Hitachi S-4800) and transmission electron microscope (Philips Tecna 10). BET surface area of the samples was measured by a Nova 4200e (Quantachrome) instrument. CHN analysis was performed using a Heraeus CHN-O-Rapid analyzer. H<sub>2</sub>-TPR experiments were carried out in a quartz tube micro-reactor. The effluent gases were monitored by means of a GC thermal conductivity detector. Before each H<sub>2</sub>-TPR run, the oxidic precursors (10 mg) was heated from RT to 120 °C in He and maintained at this temperature for 30 min. After being cooled to RT, the sample was heated from 30 °C to 1000 °C at a rate of 4 °C/min in a gas mixture of 10% H<sub>2</sub>/Ar (80 ml min<sup>-1</sup>). CO<sub>2</sub> and CH<sub>4</sub> dissociation studies were performed using a

flow of 2%CO<sub>2</sub>(2%CH<sub>4</sub>)/Ar (50 ml min<sup>-1</sup>). Prior to the dissociation reaction, the sample was preheated to 900 °C under an H<sub>2</sub> flow and then the gas mixtures were allowed to pass through the sample. The change of CH<sub>4</sub> and CO<sub>2</sub> during reaction was monitored using gas chromatography (GC).

## 2. Results

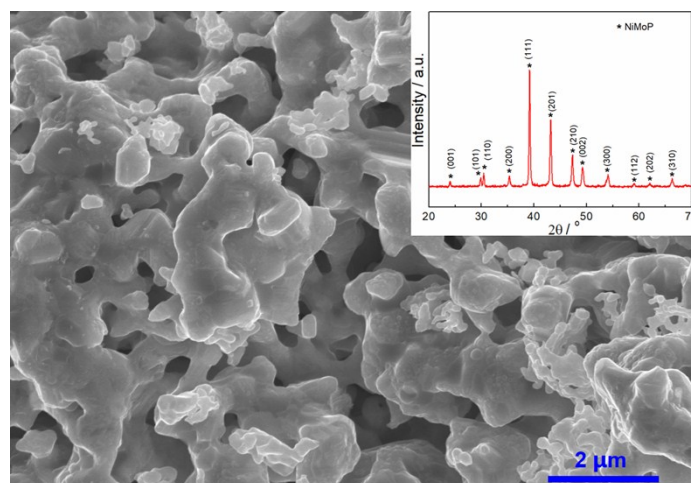

Fig. S1 SEM image of H<sub>2</sub>-NiMoP sample. The inset shows the XRD pattern of the sample.

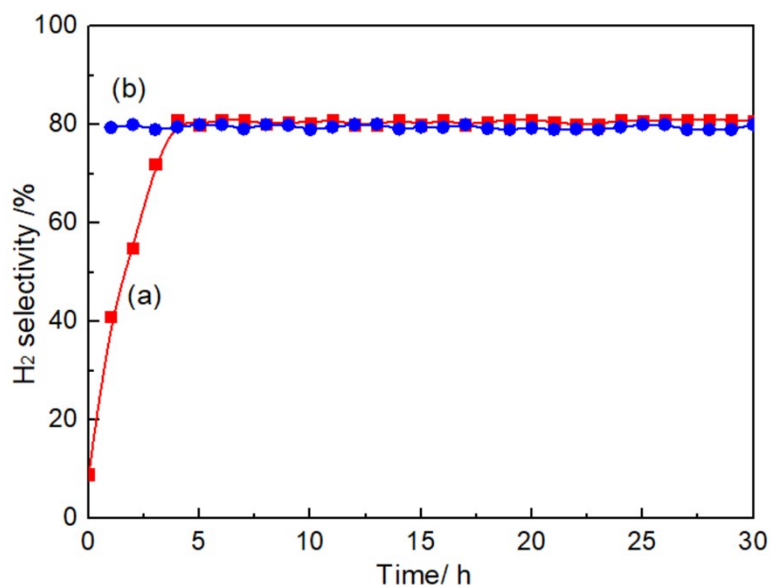

Fig. S2 H<sub>2</sub> selectivity over the (a) Ni<sub>1</sub>Mo<sub>1</sub>P<sub>1</sub> precursors and (b) H<sub>2</sub>-NiMoP in DRM. Reaction conditions: CH<sub>4</sub>:CO<sub>2</sub>=1:1, WHSV=9000 cm<sup>3</sup> g<sup>-1</sup> h<sup>-1</sup>, reaction pressure= 1 atm, reaction temperature=900 °C.

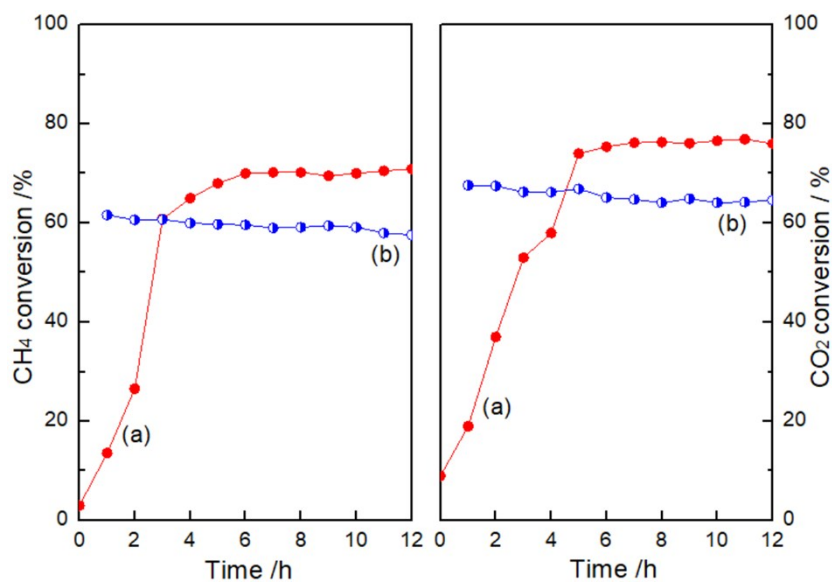

Fig. S3 CH<sub>4</sub> and CO<sub>2</sub> conversions over the (a) Ni<sub>1</sub>Mo<sub>1</sub>P<sub>1</sub> precursor and (b) H<sub>2</sub>-NiMoP in DRM. Reaction conditions: CH<sub>4</sub>:CO<sub>2</sub>=1:1, WHSV=24000 cm<sup>3</sup> g<sup>-1</sup> h<sup>-1</sup>, reaction pressure= 1 atm, reaction temperature=900 °C.

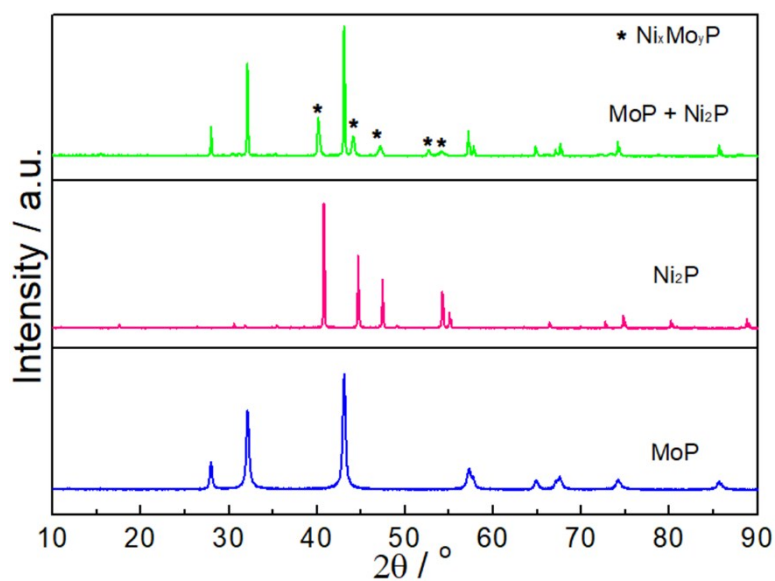

Fig. S4 XRD pattern of mechanical mixture of Ni<sub>2</sub>P and MoP (Ni:Mo=1:1) treated in H<sub>2</sub> at 800 °C for 1 h. The patterns of Ni<sub>2</sub>P and MoP are also shown for comparison.
